# Supplementary material for: Comparative Analysis of Nutritional Quality of Dendrobium Officinale Kimura Et Migo After Transplantation of Artificially Cultivated Plants From South to North China During Different Growing Years
Source: Research Square preprint supplement (doi:10.21203/rs.3.rs-521625/v1), 2021-05-20
Supplement: Supplementary file 1 [file b048ece5757eb22564d62071.xlsx]

## Sheet: Sheet1
No.	Index	Q1 (Da)	Molecular Weight (Da)	Formula	Ionization model	Compounds	Class I	Class II	CAS	Level	AN1	AN2	AN3	AN4	AN5	BEI1	BEI2	BEI3	BEI4	BEI5	mix01	mix02	mix03	cpd_ID	kegg_map
1	Hmcp001589	787.23	786.221	C34H42O21	[M+H]+	isorhamnetin-O-Hexoside-O-Hexoside-O-Rhamnoside	Flavonoids	Flavonols	-	B	69836	134810	148540	61510	93314	12703	23338	13318	79165	14625	66920	62419	57821	--	--
2	Hmcp001859	625.17	624.17	C28H32O16	[M+H]+	isorhamnetin-O-rutinoside	Flavonoids	Flavonols	-	B	6452500	9	9498400	7100900	6540700	8590300	7325900	8041300	9571700	2502200	6378200	6186000	6366600	--	--
3	Hmcp002029	581.15	580.142	C26H28O15	[M+H]+	Kaempferol-O-Pentoside-O-Hexoside	Flavonoids	Flavonols	-	B	634520	9	384330	522090	623000	9	120890	33918	98437	56686	286010	244260	214150	--	--
4	Hmjp007381	515.31	514.303	C27H46O9	[M+H]+	Glyceryl linoleate-O-Hexoside	Lipids	Glycerol ester	-	B	152390	113710	344640	142370	193410	50526	55711	126310	79739	88096	179560	135650	131040	--	--
5	Hmmp002121	469.12	468.113	C23H16O11	[M+H]+	Isorhamnetin-O-gallate	Flavonoids	Flavonols	-	B	2555.6	4628.7	9	4923.6	4061	241360	224220	252310	155370	141570	56269	70906	58472	--	--
6	Hmmp002336	611.16	610.148	C30H26O14	[M+H]+	Quercetin-O-feruloyl-Pentoside	Flavonoids	Flavonols	-	A	62813000	35251000	46410000	63314000	75735000	747650	296770	523800	732350	150640	43668000	42604000	39472000	--	--
7	Hmpp003391	449.1	448.091	C21H20O11	[M+H]+	Luteolin-3'-O-β-D-glucoside	Flavonoids	Flavonoid	-	B	10653	9	17184	18243	19646	4972.1	16798	19114	13262	8307.6	13863	11791	7630	--	--
8	Lmbp002592	611.16	610.153	C27H30O16	[M+H]+	Kaempferol-3,7-di-O-β-D-glucopyranoside	Flavonoids	Flavonols	-	A	395480	1968.5	962900	462620	449840	249890	231570	204710	218180	68009	276360	305480	269510	--	--
9	Lmdp003286	465.1	464.095	C21H20O12	[M+H]+	isohyperoside	Flavonoids	Flavonols	35589-21-0	B	7990200	2544600	4526900	9581400	13727000	101110	9	53191	56010	9	5843500	3832500	3800600	--	--
10	Lmdp003577	433.11	432.106	C21H20O10	[M+H]+	Genistin (Genistein 7-O-Glucoside)	Flavonoids	Isoflavones	-	A	70533	174360	211150	77534	82966	351680	371000	374210	170530	353110	201520	163330	189220	C09126	ko00943
11	Lmhp002613	627.15	626.148	C27H30O17	[M+H]+	Myricetin-O-glucoside-rhamnoside	Flavonoids	Flavonols	-	B	283750	117490	194560	296960	413200	9	9	9	9	9	139800	124080	113840	--	--
12	Lmlp002990	595.17	594.158	C27H30O15	[M+H]+	Isosaponarin（Isovitexin-4'-O-glucoside）	Flavonoids	Flavonoid carbonoside	19416-87-6	B	15908000	302040	40679000	20282000	18017000	58675000	48080000	52496000	40297000	21860000	32504000	32756000	34192000	--	--
13	Lmmp001965	789.2	788.201	C33H40O22	[M+H]+	Gossypetin glu-glu-rha	Flavonoids	Flavonols	-	B	140900	179160	339260	177730	197810	44070	56601	34986	158640	37098	148360	126850	147460	--	--
14	Lmmp002529	773.21	772.206	C33H40O21	[M+H]+	Gossypetin glu-rha-rha	Flavonoids	Flavonols	-	A	123770	45030	138490	128370	177840	4061.3	17019	6228.7	24790	10779	81966	52768	58468	--	--
15	Lmmp002796	627.16	626.148	C27H30O17	[M+H]+	Gossypetin-rutinoside	Flavonoids	Flavonols	-	B	272570	140910	198370	284460	429730	9	9	9	9	9	153940	136020	127840	--	--
16	Qingke_Rfmb319-1-2	130.09	129.079	C6H11NO2	[M+H]+	Pipecolic acid	Amino acids and derivatives	Amino acids and derivatives	4043-87-2	A	26070	23847	56703	37551	21932	26819	26871	48816	22970	39583	24194	24380	27388	--	--
17	VLmsp004426	565.15	564.148	C26H28O14	[M+H]+	Apigenin	Flavonoids	Flavonoid	-	A	4724900	1235400	3192500	5177400	5037600	1369500	3004400	2695900	2065600	2393800	3254200	2985300	3206100	--	--
18	YC512118	282.28	281.272	C18H35NO	[M+H]+	Octadecenoic amide	Others	Others	-	A	142060	319320	185740	194380	229240	273740	191530	316130	110820	267130	230030	223520	228340	--	--
19	Zmhp002303	625.18	624.168	C28H32O16	[M+H]+	Isochrysoeriol O-dihexoside	Flavonoids	Flavonoid	-	B	453300	61272	928860	594220	525470	2274100	1433900	1507800	976460	482150	996200	948870	1004400	--	--
20	Zmhp002574	611.16	610.153	C27H30O16	[M+H]+	Iso-8-C-hexosyl-luteolin O-hexoside	Flavonoids	Flavonoid carbonoside	-	B	970100	9	2265200	1077200	891500	1049400	864050	787280	786150	308550	954200	828800	964860	--	--
21	Zmhp002897	625.18	624.168	C28H32O16	[M+H]+	Isochrysoeriol C-hexosyl-O-hexoside	Flavonoids	Flavonoid	-	B	2319300	9	3531600	2361000	2208400	2564200	2288000	2930100	3879500	973140	2215000	2395600	2510700	--	--
22	Zmhp003514	301.07	300.063	C16H12O6	[M+H]+	6,7,8-tetrahydroxy-5-methoxyflavone	Flavonoids	Flavonoid	-	B	21402	141390	26175	17983	12574	34738	32878	40897	31588	22642	31608	32993	34932	--	--
23	mws0001	133.05	132.054	C4H8N2O3	[M+H]+	L-Asparagine Anhydrous	Amino acids and derivatives	Amino acids and derivatives	70-47-3	B	62209	29585	59942	41324	46650	14030	15752	12361	23817	36929	25023	16414	21409	C00152	ko00250,ko00460,ko00970,ko01100,ko01110,ko01230
24	mws0009	179.06	178.063	C10H10O3	[M+H]+	Coniferaldehyde	Phenolic acids	Phenolic acids	20649-42-7	B	11461	3502.9	6495.2	10829	9588.4	10966	19967	10855	19618	8542.1	11617	15341	12997	C02666	ko00940,ko01100,ko01110
25	mws0018	203	202.216	C10H26N4	[M+H]+	Spermine	Alkaloids	Phenolamine	71-44-3	B	1748900	1805000	1945100	2055400	1905300	1972100	1761700	1968100	1773900	2063500	1840300	1751800	1855400	C00750	ko00330,ko00410,ko00480,ko01100
26	mws0057	451	450.116	C21H22O11	[M+H]+	Eriodictyol 7-O-glucoside	Flavonoids	Dihydroflavone	38965-51-4	B	3769.2	2656	81287	6721.5	6493.3	13572	35731	19760	16192	41595	17660	13475	11517	--	--
27	mws0072	433.11	432.106	C21H20O10	[M+H]+	Apigenin 5-O-glucoside	Flavonoids	Flavonoid	28757-27-9	B	6686.9	307860	21554	11166	14978	39340	55858	20455	23397	113540	59027	55184	46865	--	--
28	mws0120	258.11	257.103	C8H20NO6P	[M+H]+	Choline alfoscerate	Lipids	PC	28319-77-9	B	75869	295330	155990	183140	105890	231240	125220	199970	102080	78338	117480	140860	131050	--	--
29	mws0124	247.1	246.1	C13H14N2O3	[M+H]+	N-(3-Indolylacetyl)-L-alanine	Amino acids and derivatives	Amino acids and derivatives	57105-39-2	B	9	9	9	9	9	9	37819	58082	14710	8699.3	11250	10880	8616	--	--
30	mws0126	524.37	523.364	C26H54NO7P	[M+H]+	1-Stearoyl-sn-glycero-3-phosphocholine	Lipids	LPC	19420-57-6	B	586460	1387400	1660800	1455800	630170	1138500	829290	879970	706470	674630	1000800	991130	1006300	--	--
31	mws0133	123.1	122.048	C6H6N2O	[M+H]+	Nicotinamide	Others	Vitamin	98-92-0	B	1172200	1294800	1243600	3103000	389070	692680	648170	883120	596170	576090	1105600	1120400	1017900	C00153	ko00760,ko01100
32	mws0170	287	287.056	C15H11O6	[M]+	Cyanidin chloride	Flavonoids	Anthocyanins	528-58-5	A	9	9	9	9	9	15161	37097	20253	6638.6	21318	8935	9770.2	10207	--	--
33	mws0193	190.1	189.111	C7H15N3O3	[M+H]+	L-Homocitrulline	Amino acids and derivatives	Amino acids and derivatives	1190-49-4	B	238180	214880	313090	239850	250620	175860	147550	180920	136340	167110	220680	241440	250160	C02427	--
34	mws0221	241	240.024	C6H12N2O4S2	[M+H]+	L-(-)-Cystine	Amino acids and derivatives	Amino acids and derivatives	56-89-3	B	928100	931240	720090	988300	849140	205820	77976	102250	100980	121600	371320	275990	304480	C00491	ko00270,ko01100,ko02010
35	mws0227	132.1	131.095	C6H13NO2	[M+H]+	L-Leucine	Amino acids and derivatives	Amino acids and derivatives	61-90-5	A	316610	381720	520410	264030	353820	290090	331520	359440	157340	303330	312560	318090	320590	C00123	ko00280,ko00290,ko00966,ko00970,ko01100,ko01110,ko01210,ko01230,ko02010
36	mws0230	120	119.058	C4H9NO3	[M+H]+	L-(-)-Threonine	Amino acids and derivatives	Amino acids and derivatives	72-19-5	B	164080	265060	261470	132230	155050	91811	100090	129250	65134	85916	113820	110000	104780	C00188	ko00260,ko00261,ko00290,ko00860,ko00970,ko01100,ko01110,ko01230,ko02010
37	mws0232	377	376.138	C17H20N4O6	[M+H]+	Riboflavin	Others	Vitamin	83-88-5	A	1023600	766040	830280	647100	861950	116990	71099	163450	93078	122950	441700	523060	556540	C00255	ko00740,ko01100,ko01110,ko02010
38	mws0250	182.1	181.074	C9H11NO3	[M+H]+	L-(-)-Tyrosine	Amino acids and derivatives	Amino acids and derivatives	60-18-4	A	28043000	40586000	45262000	26992000	30442000	48734000	41877000	47701000	25584000	37915000	34928000	35205000	36573000	C00082	ko00130,ko00261,ko00350,ko00360,ko00400,ko00460,ko00730,ko00940,ko00950,ko00965,ko00966,ko00970,ko01100,ko01110,ko01210,ko01230
39	mws0251	127	126.043	C5H6N2O2	[M+H]+	Thymine	Nucleotides and derivatives	Nucleotides and derivatives	65-71-4	A	2716.4	1709.2	6200.2	6188.9	1865.8	12381	23098	52833	30155	9578.2	14454	14016	13578	C00178	ko00240,ko01100
40	mws0254	156.1	155.07	C6H9N3O2	[M+H]+	L-Histidine	Amino acids and derivatives	Amino acids and derivatives	71-00-1	B	4405400	4166900	5927900	4003800	4891500	6279200	6446200	7203200	3266900	6439100	5333200	5430500	4969300	C00135	ko00340,ko00410,ko00970,ko01100,ko01110,ko01230,ko02010
41	mws0255	112	111.043	C4H5N3O	[M+H]+	Cytosine	Nucleotides and derivatives	Nucleotides and derivatives	71-30-7	A	1175300	1176700	1074300	671230	1339200	60387	39809	124200	70037	47513	401890	348050	383350	C00380	ko00240,ko01100
42	mws0256	118.1	117.079	C5H11NO2	[M+H]+	L-Valine	Amino acids and derivatives	Amino acids and derivatives	72-18-4	A	175620	249470	339440	147770	230920	167370	202520	215800	104200	178240	184790	185470	185030	C00183	ko00280,ko00290,ko00460,ko00770,ko00966,ko00970,ko01100,ko01110,ko01210,ko01230,ko02010
43	mws0258	132	131.095	C6H13NO2	[M+H]+	L-Isoleucine	Amino acids and derivatives	Amino acids and derivatives	73-32-5	A	14319000	16166000	22306000	11760000	15923000	13249000	14824000	15797000	6815700	12123000	14160000	13390000	14045000	C00407	ko00280,ko00290,ko00460,ko00960,ko00966,ko00970,ko01100,ko01110,ko01210,ko01230,ko02010
44	mws0260	175	174.112	C6H14N4O2	[M+H]+	L-(+)-Arginine	Amino acids and derivatives	Amino acids and derivatives	74-79-3	A	6118900	6090800	6398100	4980000	7190700	2860300	2595500	2995200	1213700	1925600	4020800	3459200	3635600	C00062	ko00220,ko00261,ko00330,ko00472,ko00970,ko00998,ko01100,ko01110,ko01230,ko02010
45	mws0520	224.1	223.084	C11H13NO4	[M+H]+	N-Acetyl-L-tyrosine	Amino acids and derivatives	Amino acids and derivatives	537-55-3	B	7566.7	7066.5	10098	7928.2	6866.1	14334	32945	38129	12944	24874	15246	17236	15296	--	--
46	mws0567	146.09	145.085	C5H11N3O2	[M+H]+	4-Guanidinobutyric acid	Organic acids	Organic acids	463-00-3	B	241000	243450	300250	212050	240610	141060	142260	143740	196140	116960	185880	162310	154120	C01035	ko00330,ko01100
47	mws0572	126.1	125.059	C5H7N3O	[M+H]+	5-Methylcytosine	Nucleotides and derivatives	Nucleotides and derivatives	554-01-8	A	594470	410580	492690	364010	617320	94108	37391	49627	51447	72909	225690	315960	276510	C02376	ko00240,ko01100
48	mws0596	154.04	153.043	C7H7NO3	[M+H]+	3-Hydroxyanthranilic acid	Organic acids	Organic acids	548-93-6	B	67549	46859	101790	64127	65498	34961	62656	52136	69575	46096	60507	61023	45453	C00632	ko00380,ko01100
49	mws0629	281.3	280.106	C13H16N2O5	[M+H]+	Asp-phe	Amino acids and derivatives	Amino acids and derivatives	13433-09-5	A	2296300	1449900	2055300	1739200	3263800	9	9	9	9	9	1099000	1120200	1192000	--	--
50	mws0636	313.4	312.147	C18H20N2O3	[M+H]+	Phe-Phe	Amino acids and derivatives	Amino acids and derivatives	2577-40-4	A	665670	488570	907870	412790	818670	8698.6	10774	111520	31639	31935	324020	347800	335130	--	--
51	mws0663	181.1	180.065	C7H8N4O2	[M+H]+	1,7-Dimethylxanthine	Nucleotides and derivatives	Nucleotides and derivatives	611-59-6	B	21815	17963	21316	52889	6922.8	10745	6043.5	6404.5	9105.2	9975.1	15532	16373	18325	C13747	ko00232,ko01100,ko01110
52	mws0671	120.1	119.058	C4H9NO3	[M+H]+	L-Homoserine	Organic acids	Organic acids	672-15-1	B	15413	21001	14812	17066	12587	34683	25807	37200	28805	19824	25751	21857	30833	C00263	ko00260,ko00270,ko00300,ko00920,ko01100,ko01110,ko01230
53	mws0675	335.1	334.057	C11H15N2O8P	[M+H]+	β-Nicotinamide mononucleotide	Nucleotides and derivatives	Nucleotides and derivatives	1094-61-7	B	219260	118240	94147	115960	155680	30997	24728	26260	21098	14802	50831	59555	80140	C00455	ko00760,ko01100
54	mws0736	189.1	188.116	C8H16N2O3	[M+H]+	N-Glycyl-L-leucine	Amino acids and derivatives	Amino acids and derivatives	869-19-2	A	2660800	1678800	2249600	2008100	3673400	45985	36545	179060	59704	58385	1227800	1135900	1084500	C02155	--
55	mws0847	150	149.07	C6H7N5	[M+H]+	1-Methyladenine	Nucleotides and derivatives	Nucleotides and derivatives	5142-22-3	B	251450	755600	228630	216620	252810	488150	327580	438910	180430	569480	364890	367580	311500	C02216	--
56	mws1033	303.09	302.079	C16H14O6	[M+H]+	Homoeriodictyol	Flavonoids	Dihydroflavone	446-71-9	B	142890	599050	126830	81494	83635	297560	321150	220610	191500	129320	194260	225370	216440	--	--
57	mws1050	148.05	147.053	C5H9NO4	[M+H]+	O-Acetylserine	Amino acids and derivatives	Amino acids and derivatives	5147-00-2	B	56152	83545	52601	53695	76336	64699	64149	132910	69348	41310	71515	67659	71098	C00979	ko00270,ko00908,ko00920,ko00998,ko01100,ko01110,ko01200,ko01230,ko04122
58	mws1073	595.2	594.159	C27H30O15	[M+H]+	Apigenin 6,8-C-diglucoside	Flavonoids	Flavonoid	23666-13-9	A	1889300	30451000	8630000	2213700	2344000	22725000	15568000	17424000	13456000	9222100	13946000	13541000	13422000	--	--
59	mws1195	179.1	178.063	C10H10O3	[M+H]+	Methyl p-coumarate	Phenolic acids	Phenolic acids	3943-97-3	B	46144	63012	61073	53398	44915	132420	121610	92412	82790	88874	67729	78829	60573	--	--
60	mws1212	209.1	208.074	C11H12O4	[M+H]+	Methyl ferulate	Phenolic acids	Phenolic acids	2309-07-1	B	95670	148640	123530	262180	274520	205470	246640	212300	179270	154890	161080	248870	166690	--	--
61	mws1292	565.2	564.148	C26H28O14	[M+H]+	Isoschaftoside	Flavonoids	Flavonoid carbonoside	52012-29-0	A	575010	25972000	2527800	596890	656950	21104000	11522000	15102000	11514000	8789500	10410000	10208000	10871000	--	--
62	mws1299	449.1	448.101	C21H20O11	[M+H]+	Orientin	Flavonoids	Flavonoid carbonoside	28608-75-5	B	17050	164750	33796	9774.4	20113	37777	27114	28601	30666	83278	46596	39068	44571	C10114	--
63	mws1336	138.05	137.048	C7H7NO2	[M+H]+	4-Aminobenzoic acid	Phenolic acids	Phenolic acids	150-13-0	B	9255.4	9166	14806	6469.9	7472.3	6275.6	13389	6682.7	4447	14181	11029	10487	10310	--	--
64	mws1337	220.2	219.111	C9H17NO5	[M+H]+	D-Pantothenic Acid	Others	Vitamin	79-83-4	A	3046100	2328500	5131900	3833600	3339100	7509700	7259200	8229800	4289600	8372900	4995500	4992400	4779400	C00864	ko00410,ko00770,ko01100,ko01110
65	mws1349	302.3	301.298	C18H39NO2	[M+H]+	D-erythro-sphinganine	Alkaloids	Alkaloids	764-22-7	A	23197	36457	32242	30601	17603	47039	30662	44099	44851	48174	31507	24221	33807	C00836	ko00600,ko01100
66	mws1526	359.13	358.126	C16H22O9	[M+H]+	Sweroside	Terpenoids	Sesquiterpenoids	14215-86-2	B	650260	555520	470650	712020	626160	453120	333990	392000	591770	159560	457340	496040	504380	C17071	--
67	mws1660	565.15	564.148	C26H28O14	[M+H]+	Schaftoside	Flavonoids	Flavonoid carbonoside	51938-32-0	A	4478.9	106170	18333	4438.1	3607.5	78333	41403	50589	47092	50178	34181	27233	30708	--	--
68	mws2218	195.08	194.08	C8H10N4O2	[M+H]+	Caffeine	Alkaloids	Alkaloids	58-08-2	A	26032	33327	34276	40570	29437	16055	13849	12735	6743.4	6396.2	23241	17940	42638	C07481	ko00232,ko01100,ko01110
69	mws2608	222.1	221.09	C8H15NO6	[M+H]+	N-Acetyl-D-galactosamine	Others	Others	1811-31-0	B	22560	53029	20290	40995	40867	26702	25280	23941	12122	12338	24361	31156	22824	--	--
70	mws4174	222.09	221.09	C8H15NO6	[M+H]+	N-Acetyl-β-D-mannosamine	Others	Others	7772-94-3	B	363780	367780	288760	233350	510860	27127	52841	47426	42125	44309	103630	74191	92158	--	--
71	mws4176	237.12	236.116	C12H16N2O3	[M+H]+	DL-Alanyl-DL-phenylalanine	Amino acids and derivatives	Amino acids and derivatives	1999-45-7	A	2376300	3175900	4039400	1816700	3303000	29345	50690	431190	112730	119300	1620400	1480100	1483900	--	--
72	mws5035	279.17	278.163	C15H22N2O3	[M+H]+	Leucylphenylalanine	Amino acids and derivatives	Amino acids and derivatives	56217-82-4	A	11306000	9740900	14948000	7389200	16013000	121060	169220	1733600	431200	435570	6245600	6259200	6222600	--	--
73	mws5040	365.11	341.108	C12H21O11Na	[M+H]+	Turanose	Others	Saccharides and Alcohols	547-25-1	A	6135800	9867000	1523300	11689000	4460800	31534000	35668000	34835000	57635000	28428000	25725000	29215000	31289000	--	--
74	mws5041	189.12	188.116	C8H16N2O3	[M+H]+	Glycylisoleucine	Amino acids and derivatives	Amino acids and derivatives	19461-38-2	B	115520	97914	122150	94832	191360	2622.7	1869.2	9356.9	3728.6	2335.8	62888	52221	57672	--	--
75	mws5042	223.11	222.1	C11H14N2O3	[M+H]+	Glycylphenylalanine	Amino acids and derivatives	Amino acids and derivatives	721-66-4	A	2371700	2854400	3272200	1726500	3062000	47869	25048	134460	52841	42436	1432300	1300600	1421200	--	--
76	pma0134	121.04	120.042	C4H9O7P	[M+H]+	D(-)-Threose	Others	Saccharides and Alcohols	95-43-2	B	197060	140220	238690	198220	219210	138190	179490	120660	68675	179750	168060	168650	159640	--	--
77	pma0948	138.09	137.091	C8H11NO	[M+H]+	Hydroxyphenethylamine	Others	Others	-	B	11274000	7548400	12366000	10486000	11423000	7349300	10157000	6835800	4242700	10407000	9912700	9876800	8777500	--	--
78	pma1751	286	285	C12H15NO7	[M+H]+	Nicotinic acid-hexoside	Others	Vitamin	-	B	7764.1	45387	9591.9	16463	10667	17725	5376.6	4355.4	6152.5	8880.5	18627	15301	16230	--	--
79	pma2987	142.1	141.09	C6H11N3O	[M+H]+	Histidinol	Others	Others	501-28-0	B	168210	165810	174880	165760	185500	172010	164570	170540	157920	150160	177920	161830	151320	C00860	ko00340,ko01100,ko01110,ko01230
80	pma3101	256.2	255.2	C11H13NO6	[M+H]+	Nicotinate ribonucleoside	Others	Vitamin	17720-18-2	B	4954300	4723800	3493500	4116000	4571100	1326400	1068800	1030500	916240	1022800	2040200	2154600	2281500	C05841	ko00760,ko01100
81	pmb0069	122	121	C7H7NO	[M+H]+	Benzamide	Others	Others	55-21-0	B	1364200	340070	1734600	1074100	1016600	361170	814060	760120	240860	1304200	915290	858120	844410	C09815	--
82	pmb0149	351	350.246	C21H34O4	[M+H]+	MAG(18:4)isomer1	Lipids	Glycerol ester	-	A	14186	14228	45108	19250	35152	1587.9	3432.7	9663.6	4715.9	3475.3	14280	17115	17725	--	--
83	pmb0164	355.1	354.277	C21H38O4	[M+H]+	MAG(18:2)isomer1	Lipids	Glycerol ester	-	A	23835	22130	20115	30320	43579	1982.4	7340.2	22398	11635	14465	20164	22322	21646	--	--
84	pmb0197	298.1	297.1	C11H15N5O5	[M+H]+	N2-methylguanosine	Nucleotides and derivatives	Nucleotides and derivatives	-	B	1169900	947310	994650	778630	996390	181560	84423	147320	83194	485950	603640	675880	706380	--	--
85	pmb0287	351.4	350.246	C21H34O4	[M+H]+	MAG(18:4)isomer2	Lipids	Glycerol ester	-	B	8578.9	9495.5	4881.8	7181.3	5951.5	4173	3223.2	3583.6	2134.3	2754.9	4491.2	7031.3	6013.7	--	--
86	pmb0296	357.2	356.293	C21H40O4	[M+H]+	MAG(18:1)isomer2	Lipids	Glycerol ester	-	A	177410	114140	588270	280560	321100	54567	278530	502020	342850	264160	300490	297750	302780	--	--
87	pmb0374	136.1	135.055	C5H5N5	[M+H]+	Aminopurine	Alkaloids	Alkaloids	452-06-2	A	1880400	1318300	1338100	1212800	1729000	21975	23412	197000	77822	59793	911770	824700	795650	--	--
88	pmb0382	339.1	338.079	C19H14O6	[M+H]+	O-Feruloyl 4-hydroxylcoumarin	Lignans and Coumarins	Coumarins	-	B	195490	9	9	230460	242890	381080	229020	255250	208260	141950	196040	208280	173670	--	--
89	pmb0449	162.1	161.1	C6H11NO4	[M+H]+	2-Aminoadipic acid (L-Homoglutamic acid)	Amino acids and derivatives	Amino acids and derivatives	542-32-5	B	319100	372300	525220	366260	365610	248660	270520	314510	192860	255730	293700	268940	253120	C00956	ko00300,ko00310,ko01100,ko01110,ko01210,ko01230
90	pmb0490	235.1	234.137	C13H18N2O2	[M+H]+	N-p-Coumaroyl putrescine	Alkaloids	Phenolamine	34136-53-3	A	479800	1459400	1355200	549400	402990	94912	193160	98139	50803	579720	554300	519930	532930	C18326	ko00330,ko01100
91	pmb0501	131.1	130.122	C5H14N4	[M+H]+	Agmatine	Alkaloids	Phenolamine	306-60-5	B	294040	934420	434710	269880	272860	108410	117540	103200	96211	52244	227580	186770	215930	C00179	ko00330,ko01100
92	pmb0530	664.2	663.109	C21H27N7O14P2	[M+H]+	Nicotinic acid adenine dinucleotide	Nucleotides and derivatives	Nucleotides and derivatives	53-84-9	B	131600	189540	110260	175250	97450	275310	318880	263380	130910	171080	203370	222930	246780	C00003	ko00190,ko00730,ko00760,ko01100
93	pmb0566	581.2	580.143	C26H28O15	[M+H]+	Luteolin O-hexosyl-O-pentoside	Flavonoids	Flavonoid	-	B	1330400	28332	1103300	1506400	1468800	9	438360	206570	352160	197340	625560	634610	617800	--	--
94	pmb0608	549.1	548.117	C25H24O14	[M+H]+	Chrysoeriol O-malonylhexoside	Flavonoids	Flavonoid	-	B	2024	170850	7861.3	1274.1	1819.9	24728	37684	22232	13909	18668	27876	22511	24629	--	--
95	pmb0613	757.1	756.211	C33H40O20	[M+H]+	Apigenin 6-C-hexosyl-8-C-hexosyl-O-hexoside	Flavonoids	Flavonoid	-	B	17936	2122.5	21129	26997	17530	41147	39933	31998	28507	17922	24811	23763	21963	--	--
96	pmb0622	611.2	610.153	C27H30O16	[M+H]+	C-Hexosyl-luteolin O-hexoside	Flavonoids	Flavonoid carbonoside	-	B	97338	32561	256520	89855	106730	457310	319590	319070	266420	117190	201050	200060	243460	--	--
97	pmb0624	611.1	610.153	C27H30O16	[M+H]+	6-C-Hexosyl-luteolin O-hexoside	Flavonoids	Flavonoid carbonoside	-	B	205890	9	470610	230420	220330	232520	175060	181870	161260	61530	190710	189560	235260	--	--
98	pmb0639	757.2	756.211	C33H40O20	[M+H]+	8-C-Hexosyl-apigenin O-hexosyl-O-hexoside	Flavonoids	Flavonoid carbonoside	-	B	43024	9	73050	69161	49056	124390	126360	87855	85509	36590	80012	79506	68710	--	--
99	pmb0653	595.1	594.159	C27H30O15	[M+H]+	Di-C,C-hexosyl-apigenin	Flavonoids	Flavonoid	-	A	11178000	115640	28078000	12719000	12355000	43555000	33462000	37134000	30219000	15713000	22685000	22835000	22371000	--	--
100	pmb0676	801	800.216	C38H40O19	[M+H]+	8-C-Hexosyl-chrysoeriol O-feruloylhexoside	Flavonoids	Flavonoid carbonoside	-	B	12528	9	11553	19345	6543.2	6633	7634.7	6161.3	106640	9	16749	14140	13730	--	--
101	pmb0677	831	830.227	C39H42O20	[M+H]+	C-Hexosyl-chrysoeriol O-sinapoylhexoside	Flavonoids	Flavonoid carbonoside	-	B	16361	43611	9	15166	10588	11827	9544.8	9934.7	5230.3	14731	12260	12726	11164	--	--
102	pmb0681	403.1	402.095	C20H18O9	[M+H]+	Apigenin 8-C-pentoside	Flavonoids	Flavonoid	-	A	415040	58260	163860	433090	404330	9	51769	40693	14472	16732000	1938100	1840200	1702600	--	--
103	pmb0736	493.1	492.127	C23H24O12	[M+H]+	Tricin 7-O-hexoside	Flavonoids	Flavonoid	-	B	148270	9	224540	181330	155910	140770	194110	122020	122000	145260	142620	128040	131510	--	--
104	pmb0786	180	179	C6H13NO5	[M+H]+	Glucosamine	Others	Saccharides and Alcohols	3416-24-8	B	2636900	2593600	3297500	2907900	2895700	1986100	2213400	2361200	1714700	2158000	2604300	2168400	2140600	C00329	ko00520,ko01100
105	pmb0789	332.1	331.32	C14H21NO8	[M+H]+	Pyridoxine O-glucoside	Others	Vitamin	-	B	3811200	3220900	4069600	3955500	3476600	6297300	3099300	4305800	5968000	3370700	4128200	4392500	4544800	--	--
106	pmb0801	346	345.106	C14H19NO9	[M+H]+	4-Pyridoxic acid O-hexoside	Others	Vitamin	-	B	28337	19403	48416	38780	26488	70892	32888	46382	43013	43442	46586	54395	46537	--	--
107	pmb0848	494.3	493.3	C24H48NO7P	[M+H]+	LysoPC 16:1 (2n isomer)	Lipids	LPC	-	B	73120	69544	203450	209960	120060	80206	66345	116040	57740	65775	107360	102570	104080	--	--
108	pmb0854	518.3	517.317	C26H48NO7P	[M+H]+	LysoPC 18:3	Lipids	LPC	-	A	584980	1284700	1993500	2132100	1179100	2364500	1409800	3029200	1344600	1109600	1688000	1592300	1569400	--	--
109	pmb0855	496.3	495.333	C24H50NO7P	[M+H]+	LysoPC 16:0	Lipids	LPC	17364-16-8	A	2656000	8658100	4770100	8118900	3172700	6762600	4461100	5138300	4528500	3453100	5082700	5252000	4936900	--	--
110	pmb0856	480.31	479.301	C23H46NO7P	[M+H]+	LysoPE 18:1(2n isomer)	Lipids	LPE	-	A	866140	615950	1305000	1588100	1204800	1595800	1096400	1562500	1111700	660210	1165300	1187400	1155400	--	--
111	pmb0859	522.4	521.348	C26H52NO7P	[M+H]+	LysoPC 18:1(2n isomer)	Lipids	LPC	-	B	3132500	3447300	4500300	8905000	5417100	6685000	6292800	9036700	5827500	3385200	5869400	5999900	5696800	--	--
112	pmb0863	492.3	491.301	C24H46NO7P	[M+H]+	LysoPC 16:2(2n isomer)	Lipids	LPC	-	B	4325.8	6147.4	22074	16650	8986.9	7236.3	6105.3	11650	4542.2	5923.5	8796.4	9189.4	8682.7	--	--
113	pmb0864	426.3	425.254	C19H40NO7P	[M+H]+	LysoPE 14:0	Lipids	LPE	-	A	170460	417370	227840	325780	190220	269380	180190	202020	277920	228160	256320	226390	249400	--	--
114	pmb0865	518.2	517.317	C26H48NO7P	[M+H]+	LysoPC 18:3(2n isomer)	Lipids	LPC	-	A	475640	1010000	1769100	1677800	998650	1991000	1198100	2436700	1178400	915510	1337400	1215900	1330900	--	--
115	pmb0866	468.1	467.301	C22H46NO7P	[M+H]+	LysoPC 14:0	Lipids	LPC	-	B	85284	303230	130820	294340	115110	201890	149860	161980	240080	133180	183380	171530	171580	--	--
116	pmb0874	478.6	477.286	C23H44NO7P	[M+H]+	LysoPE 18:2(2n isomer)	Lipids	LPE	-	A	53212	104730	111220	143060	74677	129770	95194	111490	83256	86244	89375	103950	98804	--	--
117	pmb0876	454.2	453.286	C21H44NO7P	[M+H]+	LysoPE 16:0	Lipids	LPE	53862-35-4	A	1427100	2715100	2443800	2493600	1556000	2519400	1621100	1694300	1306600	1587100	1839800	1853800	1892300	--	--
118	pmb0883	482.1	481.1	C23H48NO7P	[M+H]+	LysoPE 18:0	Lipids	Glycerol ester	69747-55-3	B	5028.4	5782.1	11206	4782.1	4937.9	8406.7	7790.6	5335.3	5059.5	3309	5481.7	4318	5786.1	--	--
119	pmb0885	291	290	C18H26O3	[M+H]+	4-oxo-9Z,11Z,13E,15E-octadecatetraenoic acid	Lipids	Glycerol ester	-	B	25427	20013	32105	14695	15173	18991	18791	22160	15099	18498	20082	21550	21035	--	--
120	pmb0889	279.3	278.225	C18H30O2	[M+H]+	Punicic acid	Lipids	Free fatty acids	544-72-9	A	5334900	3006100	5880200	5375800	6042400	496850	791620	1044100	437820	866680	3301300	3716300	3439100	C08364	--
121	pmb0890	355.1	354.277	C21H38O4	[M+H]+	MAG(18:2)	Lipids	Glycerol ester	-	A	7853900	2934600	8719800	5512500	5776800	3250600	4668300	5049800	3594200	2850900	5170100	5847400	5878400	--	--
122	pmb0896	265.1	264.147	C14H20N2O3	[M+H]+	N'-Feruloyl putrescine	Alkaloids	Phenolamine	-	B	201390	233720	123360	242560	163380	60448	54272	37339	36875	110900	125650	127800	110430	--	--
123	pmb0981	348.2	347.063	C10H14N5O7P	[M+H]+	Adenosine 5'-monophosphate	Nucleotides and derivatives	Nucleotides and derivatives	61-19-8	B	260460	491510	197870	345860	313880	294440	442530	437430	314440	289280	307240	322330	355850	C00020	ko00230,ko00908,ko01100,ko01110
124	pmb0998	364.1	363.058	C10H14N5O8P	[M+H]+	Guanosine 5'-monophosphate	Nucleotides and derivatives	Nucleotides and derivatives	85-32-5	B	91539	139350	56335	39026	57391	9506.6	12742	39894	12570	9	27348	31472	36867	C00144	ko00230,ko01100
125	pmb1096	118	117.058	C8H7N	[M+H]+	Indole	Alkaloids	Plumerane	120-72-9	B	5218	9227	9874.8	6436.1	5936.6	10934	9218.7	9603.8	5649.5	6439.9	7290.6	7522.4	9737	C00463	ko00380,ko00400,ko00402,ko01100,ko01110
126	pmb1312	689.2	688.2	C33H36O16	[M+H]+	Tricin 4'-O-(β-guaiacylglyceryl)ether 7-O-hexoside	Flavonoids	Flavonoid	-	B	7441.8	826.87	15430	7987.8	7822.2	5482.1	11745	6852.1	8562.8	9989.8	9363.5	7740.8	9243.4	--	--
127	pmb1452	275.1	274.1	C16H35NO2	[M+H]+	N-Lauryldiethanolamine	Others	Others	1541-67-9	B	61264	68642	35224	67737	62773	83717	76585	64868	65501	75518	64076	71555	70495	--	--
128	pmb1650	279.2	278.2	C18H30O2	[M+H]+	Octadeca-11E,13E,15Z-trienoic acid	Lipids	Glycerol ester	25575-00-2	B	174900	189360	173950	159550	170660	478170	245090	282600	411580	320590	268500	275680	274840	--	--
129	pmb1912	474.2	473.166	C20H23N7O7	[M+H]+	10-Formyl-THF	Alkaloids	Alkaloids	2800-34-2	A	1472200	622490	1531800	1745900	1419300	527580	265320	558920	312560	272270	707600	648230	899060	C00234	ko00670,ko00970,ko01100,ko01200
130	pmb2211	343.1	342.288	C19H38N2O3	[M+H]+	Cocamidopropyl betaine	Alkaloids	Alkaloids	4292-10-8	A	525390	639220	533240	753350	152170	176590	182690	150670	217290	215630	362430	350650	353930	--	--
131	pmb2221	318.3	317.293	C18H39NO3	[M+H]+	4-Hydroxysphinganine	Lipids	Sphingolipids	554-62-1	A	7780.3	8055.3	9063.4	5959.5	6170.9	11751	4961.4	9799.1	8738.7	7508.1	8538.6	7814.2	9112.1	C12144	ko00600,ko01100
132	pmb2325	353.1	352.262	C21H36O4	[M+H]+	MAG(18:3)isomer2	Lipids	Glycerol ester	-	A	457900	424890	922060	361240	433100	108240	119860	348110	186080	193560	403340	404000	353270	--	--
133	pmb2363	357.2	356.293	C21H40O4	[M+H]+	MAG(18:1)isomer1	Lipids	Glycerol ester	-	A	167680	120030	533180	275610	269440	43225	278190	497970	322390	240960	283340	284910	276860	--	--
134	pmb2388	524.1	523.1	C26H54NO7P	[M+H]+	LysoPC 18:0 (2n isomer)	Lipids	LPC	-	B	16272	16484	24947	44390	26296	32318	33429	39609	26914	16755	25540	25850	26557	--	--
135	pmb2444	353.2	352.262	C21H36O4	[M+H]+	MAG(18:3)isomer1	Lipids	Glycerol ester	-	A	8273100	6341700	6925700	8789400	7064500	13798000	18043000	13381000	10370000	9400900	9905100	10370000	10808000	--	--
136	pmc0281	400.2	399.2	C17H25N5O4SSi	[M+H]+	Adenosine O-ribose	Nucleotides and derivatives	Nucleotides and derivatives	-	B	200160	271320	268490	203240	221660	264520	124240	162540	227470	230360	221450	219090	245730	--	--
137	pmc0960	544.4	543.4	C28H50NO7P	[M+H]+	LysoPC 20:4	Lipids	LPC	-	B	49672	43723	66741	140280	88338	115040	117150	161740	96658	58983	101920	96915	112650	--	--
138	pmd0130	468.3	467.301	C22H46NO7P	[M+H]+	LysoPC 14:0(2n isomer)	Lipids	LPC	-	A	48796	65945	97644	104250	65322	47391	44284	62936	63843	40600	61454	58541	60051	--	--
139	pmd0132	496.33	495.333	C24H50NO7P	[M+H]+	LysoPC 16:0(2n isomer)	Lipids	LPC	-	A	406520	663450	1175000	894130	541410	571900	466540	680190	380190	291440	618250	599340	593810	--	--
140	pmd0136	524.36	523.364	C26H54NO7P	[M+H]+	LysoPC 18:0	Lipids	LPC	-	A	39704	81644	101880	84645	46938	57246	56620	74763	51171	39547	65394	63202	70478	--	--
141	pmd0144	550.37	549.37	C28H56NO7P	[M+H]+	LysoPC 20:1 (2n isomer)	Lipids	LPC	-	B	26747	23993	31607	54347	33377	40885	27045	49121	21093	22461	36907	28068	34172	--	--
142	pmd0145	550.37	549.37	C28H56NO7P	[M+H]+	LysoPC 20:1	Lipids	LPC	-	B	23876	19881	35620	56296	31029	34623	30083	41665	22890	18411	32711	31653	36113	--	--
143	pme0006	116.1	115.063	C5H9NO2	[M+H]+	L-Proline	Amino acids and derivatives	Amino acids and derivatives	147-85-3	B	227540	203630	271380	286000	269710	218260	146380	187470	132790	154970	236050	256260	257750	C00148	ko00330,ko00332,ko00970,ko01100,ko01110,ko01230,ko02010
144	pme0008	176.1	175.096	C6H13N3O3	[M+H]+	L-Citrulline	Amino acids and derivatives	Amino acids and derivatives	372-75-8	B	274690	180810	83810	110960	163420	39799	91322	73158	38713	21024	85228	111580	65503	C00327	ko00220,ko01100,ko01110,ko01230
145	pme0014	148.1	147.053	C5H9NO4	[M+H]+	L-Glutamic acid	Amino acids and derivatives	Amino acids and derivatives	56-86-0	B	1379800	1888300	1529700	1691200	1573900	1057100	1105800	1221200	994990	1005000	1242400	1392000	1289600	C00025	ko00220,ko00250,ko00330,ko00332,ko00340,ko00430,ko00480,ko00630,ko00650,ko00660,ko00860,ko00910,ko00970,ko00998,ko01100,ko01110,ko01200,ko01210,ko01230,ko02010
146	pme0021	166	165.079	C9H11NO2	[M+H]+	L-Phenylalanine	Amino acids and derivatives	Amino acids and derivatives	63-91-2	A	14334000	14502000	19570000	11713000	15085000	22348000	13434000	18734000	8375700	13376000	14804000	14094000	13930000	C00079	ko00360,ko00400,ko00460,ko00940,ko00960,ko00966,ko00970,ko01100,ko01110,ko01210,ko01230,ko02010
147	pme0026	147	146.106	C6H14N2O2	[M+H]+	L-(+)-Lysine	Amino acids and derivatives	Amino acids and derivatives	56-87-1	A	3053200	4106500	4297900	3105400	3332300	1402600	1707600	1512900	1108900	1642800	2340600	2244400	2526900	C00047	ko00300,ko00310,ko00780,ko00960,ko00970,ko01100,ko01110,ko01210,ko01230,ko02010
148	pme0033	137	136.039	C5H4N4O	[M+H]+	Hypoxanthine	Nucleotides and derivatives	Nucleotides and derivatives	68-94-0	B	320860	278810	202170	349430	250970	374740	495620	367160	267100	402950	400790	301160	347700	C00262	ko00230,ko01100
149	pme0040	136.1	135.055	C5H5N5	[M+H]+	Adenine	Nucleotides and derivatives	Nucleotides and derivatives	73-24-5	A	610630	607070	919810	483720	616170	541590	725920	1313700	634650	369290	616760	620860	702360	C00147	ko00230,ko00908,ko01100
150	pme0120	118.2	117.079	C5H11NO2	[M+H]+	5-Aminovaleric acid	Amino acids and derivatives	Amino acids and derivatives	660-88-8	B	17480	25106	16621	36500	15790	19686	35615	28894	24201	21265	16168	15064	14955	C00431	ko00310,ko00330,ko01100
151	pme0122	189.2	188.116	C8H16N2O3	[M+H]+	N6-Acetyl-L-lysine	Amino acids and derivatives	Amino acids and derivatives	692-04-6	B	342500	562680	538050	298310	376200	283600	301090	286230	196920	251650	312510	260460	285630	C02727	ko00310,ko01100
152	pme0124	173.2	172.085	C7H12N2O3	[M+H]+	Glycyl-L-proline	Amino acids and derivatives	Amino acids and derivatives	704-15-4	B	231990	215480	247420	220220	350970	48669	52655	59268	35177	467750	147040	135260	155450	--	--
153	pme0170	217.1	216.122	C8H16N4O3	[M+H]+	N-α-Acetyl-L-arginine	Amino acids and derivatives	Amino acids and derivatives	155-84-0	B	100100	146970	124840	112820	103210	102090	86030	84440	89086	100880	92013	89251	91821	--	--
154	pme0181	170.1	169.085	C7H11N3O2	[M+H]+	1-Methylhistidine	Amino acids and derivatives	Amino acids and derivatives	332-80-9	B	176680	27611	339880	163660	121930	315600	673260	507330	258070	503970	338030	307850	376130	C01152	ko00340,ko01100
155	pme0183	152.1	151.049	C5H5N5O	[M+H]+	2-Hydroxy-6-aminopurine	Nucleotides and derivatives	Nucleotides and derivatives	3373-53-3	B	394250	240760	348280	230760	361990	64207	100320	117860	69676	109960	217030	178990	204950	--	--
156	pme0193	147.07	146.069	C5H10N2O3	[M+H]+	L-Glutamine	Amino acids and derivatives	Amino acids and derivatives	56-85-9	A	3886700	4802500	5492800	3608400	4158500	1523100	1974500	1706000	1322600	1670000	2663100	2628700	2671100	C00064	ko00220,ko00230,ko00240,ko00250,ko00630,ko00910,ko00970,ko01100,ko01230,ko02010
157	pme0230	268.1	267.097	C10H13N5O4	[M+H]+	Adenosine	Nucleotides and derivatives	Nucleotides and derivatives	58-61-7	A	9419500	7051300	8135400	6992900	8980500	345260	331650	1877500	831750	706820	4950700	4840000	4981500	C00212	ko00230,ko01100,ko02010
158	pme0253	174.1	173.105	C8H15NO3	[M+H]+	N-Acetyl-L-leucine	Amino acids and derivatives	Amino acids and derivatives	1188-21-2	B	1990.3	6093.9	11961	5710.6	8012.4	5083.8	32781	24812	7257	5979.2	12139	10395	8336.9	C02710	--
159	pme0264	243.09	242.09	C10H14N2O5	[M+H]+	Thymidine	Nucleotides and derivatives	Nucleotides and derivatives	50-89-5	A	7968700	5941600	5554000	5111600	8103100	47378	49223	557930	164840	99602	3730200	3890000	3743600	C00214	ko00240,ko01100
160	pme0274	132.09	131.095	C6H13NO2	[M+H]+	6-Aminocaproic acid	Organic acids	Organic acids	60-32-2	B	672150	1091200	1476000	639320	790240	1043400	1369300	1247900	583400	1154900	1015100	893580	944120	C02378	ko01100
161	pme0278	191.09	190.095	C7H14N2O4	[M+H]+	2,6-Diaminooimelic acid	Amino acids and derivatives	Amino acids and derivatives	583-93-7	B	71278	85342	88210	71668	77269	33910	23818	25005	18696	29699	48934	28346	27619	C00666	ko00300,ko01100,ko01110,ko01230
162	pme0295	146.07	145.074	C6H11NO3	[M+H]+	4-Acetamidobutyric acid	Organic acids	Organic acids	3025-96-5	B	28279	26808	51499	23498	27009	10938	31907	14818	12534	22484	29725	34497	30430	C02946	ko00330,ko01100
163	pme0490	124	123.032	C6H5NO2	[M+H]+	Nicotinic acid	Others	Vitamin	59-67-6	B	17992	17173	11256	21508	12434	10451	11757	12778	8904.7	12084	14681	13325	15444	C00253	ko00760,ko00960,ko01100,ko01110
164	pme1002	138.08	137.084	C8H11NO	[M+H]+	L-Tyramine	Amino acids and derivatives	Amino acids and derivatives	51-67-2	A	27528000	19393000	30295000	27589000	27242000	18975000	24444000	18297000	10565000	26250000	24477000	23496000	21967000	C00483	ko00350,ko00950,ko01100,ko01110
165	pme1109	152	151.049	C5H5N5O	[M+H]+	Guanine	Nucleotides and derivatives	Nucleotides and derivatives	73-40-5	A	138250	156220	108740	98456	62980	106730	284140	581580	322650	81001	176500	158190	158620	C00242	ko00230,ko01100
166	pme1137	140	139.027	C6H5NO3	[M+H]+	6-Hydroxynicotinic acid	Alkaloids	Alkaloids	5006-66-6	B	76435	71875	64555	168190	22405	48847	40024	31798	37790	33935	60212	53998	49720	C01020	ko00760,ko01100
167	pme1173	137	136.039	C5H4N4O	[M+H]+	Allopurinol	Nucleotides and derivatives	Nucleotides and derivatives	315-30-0	B	7781.1	12801	9962.1	18082	13737	12741	19564	14996	9527.2	16462	12075	15109	12436	--	--
168	pme1178	284.09	283.092	C10H13N5O5	[M+H]+	Guanosine	Nucleotides and derivatives	Nucleotides and derivatives	118-00-3	A	76798000	54161000	60863000	59162000	77449000	1990900	1717300	11027000	3416400	3503500	46969000	47129000	40691000	C00387	ko00230,ko01100,ko02010
169	pme1184	268.1	267.097	C10H13N5O4	[M+H]+	Deoxyguanosine	Nucleotides and derivatives	Nucleotides and derivatives	961-07-9	B	31380000	20340000	20282000	17884000	26921000	160860	178870	2017100	570490	349440	12694000	12234000	13115000	C00330	ko00230,ko01100,ko02010
170	pme1194	228	227.091	C9H13N3O4	[M+H]+	Deoxycytidine	Nucleotides and derivatives	Nucleotides and derivatives	951-77-9	B	8571400	6230500	6097900	5727400	8145300	33393	38150	456600	167010	76297	3595500	3576800	4001900	C00881	ko00240,ko01100,ko02010
171	pme1210	150	149.051	C5H11NO2S	[M+H]+	L-Methionine	Amino acids and derivatives	Amino acids and derivatives	63-68-3	A	10826	6752.7	7322.2	6016.4	10194	5345.6	8758.7	6612.9	4084.3	7370.3	7975.3	9563.5	9354.7	C00073	ko00270,ko00966,ko00970,ko01100,ko01110,ko01210,ko01230
172	pme1218	124.03	123.11	C6H5NO2	[M+H]+	2-Picolinic acid	Organic acids	Organic acids	98-98-6	B	64207	53456	37081	67010	42933	53990	68819	40462	31656	63857	55227	49820	51245	C10164	ko00380,ko01100
173	pme1228	221.1	220.085	C11H12N2O3	[M+H]+	5-Hydroxy-L-tryptophan	Amino acids and derivatives	Amino acids and derivatives	56-69-9	B	171480	117090	95498	203120	114850	288650	235480	298810	146600	317350	204250	191750	186510	C00643	ko00380,ko01100
174	pme1286	385	384.122	C14H20N6O5S	[M+H]+	S-(5'-Adenosy)-L-homocysteine	Amino acids and derivatives	Amino acids and derivatives	979-92-0	B	13944	21131	15173	14276	12579	18224	16161	17474	9483.2	10136	17507	15971	12217	C00021	ko00270,ko01100,ko01230
175	pme1383	170.1	169.074	C8H11NO3	[M+H]+	Pyridoxine	Others	Vitamin	65-23-6	B	260960	286490	297990	270080	337220	211730	67235	156450	115740	46351	179630	186660	204800	C00314	ko00750,ko01100
176	pme1419	164	164.075	C6H14ClNO2S	[M-Cl]+	L-Methionine methyl ester	Amino acids and derivatives	Amino acids and derivatives	2491-18-1	B	31919	14732	15101	15783	20151	13867	15020	23741	9886	30357	21181	17640	17439	--	--
177	pme1439	165.05	164.047	C9H8O3	[M+H]+	p-Coumaric acid	Phenolic acids	Phenolic acids	501-98-4	B	114840	76738	140550	106600	65904	174780	290000	229690	198980	182140	141950	134080	139530	C00811	ko00130,ko00350,ko00940,ko00950,ko00999,ko01100,ko01110
178	pme1474	298	297.09	C11H15N5O3S	[M+H]+	5'-Deoxy-5'-(methylthio)adenosine	Nucleotides and derivatives	Nucleotides and derivatives	2457-80-9	A	9114000	8498000	7917900	8709900	7852500	17635000	17193000	17899000	11323000	18745000	12449000	12322000	13950000	C00170	ko00270,ko00908,ko01100
179	pme2122	112.08	111.08	C5H9N3	[M+H]+	Histamine	Amino acids and derivatives	Amino acids and derivatives	51-45-6	B	793020	740390	705990	485520	912560	44457	27792	70820	46720	35190	312290	234760	262060	C00388	ko00340,ko01100,ko01110
180	pme2266	245.09	244.088	C10H16N2O3S	[M+H]+	Biotin	Others	Vitamin	58-85-5	B	68465	102810	100110	91873	73825	248160	225490	235110	241660	200940	149830	143900	150040	C00120	ko00780,ko01100,ko02010
181	pme2268	138	137.048	C7H7NO2	[M+H]+	Trigonelline	Alkaloids	Alkaloids	535-83-1	A	4444400	2215300	3893100	4668800	4132900	6477000	7321900	7241400	3340600	8383600	5586600	5156000	5426100	C01004	ko00760
182	pme2433	106	105.079	C4H11NO2	[M+H]+	Diethanolamine	Others	Others	111-42-2	B	37302	26560	20234	22363	25899	19536	21953	32776	25039	20424	18221	23088	18155	C06772	ko00564
183	pme2459	449.1	448.101	C21H20O11	[M+H]+	Luteolin 7-O-glucoside(Cynaroside)	Flavonoids	Flavonoid	5373-11-5	A	46114	94410	53220	49312	40183	614920	1242900	739010	307010	704920	359190	293040	324110	C03951	ko00944
184	pme2596	184.05	183.053	C8H9NO4	[M+H]+	4-Pyridoxic acid	Others	Vitamin	82-82-6	B	36904	66727	62281	36575	34037	86374	60341	51180	44196	53258	48686	43325	41287	C00847	ko00750,ko01100
185	pme2607	192.06	191.058	C10H9NO3	[M+H]+	5-Hydroxyindole-3-acetic acid	Alkaloids	Plumerane	54-16-0	B	20740	32430	20679	26123	22934	32219	24118	35872	23171	12716	21546	19561	22363	C05635	ko00380,ko01100
186	pme2617	166	165.046	C5H11NO3S	[M+H]+	Methionine sulfoxide	Amino acids and derivatives	Amino acids and derivatives	62697-73-8	B	1801500	1943800	1965800	2003700	1858900	1884700	1856400	1886700	1837700	1951600	2095200	1822100	1614500	--	--
187	pme2621	112.1	111.032	C5H5NO2	[M+H]+	Pyrrole-2-carboxylic acid	Amino acids and derivatives	Amino acids and derivatives	634-97-9	B	2575.6	9	9	9	9	5951.2	34284	57001	18674	7979.4	9757.7	11806	8397.4	C05942	ko00330
188	pme2693	131	130.111	C6H14N2O	[M+H]+	N-Acetylputrescine	Alkaloids	Alkaloids	18233-70-0	B	475990	1516600	588980	536320	458160	197260	162860	129800	140940	79970	339920	304590	284600	C02714	ko00330,ko01100
189	pme2723	146.1	145.053	C9H7NO	[M+H]+	Indole-3-carboxaldehyde	Alkaloids	Plumerane	487-89-8	B	31177	30974	39193	18669	22878	40908	121920	79040	45677	66467	46947	47698	42392	C08493	--
190	pme2735	399.2	398.137	C15H25Cl3N6O5S	[M+H]+	S-(5'-Adenosyl)-L-methionine	Amino acids and derivatives	Amino acids and derivatives	29908-03-0	B	377000	349220	397590	422430	404180	658170	355200	508420	262630	413650	463840	433170	492380	C00019	ko00261,ko00270,ko00330,ko00908,ko01100,ko01110,ko01230,ko04122
191	pme2755	222	221.09	C7H11NO5	[M+H]+	N-Acetyl-D-glucosamine	Others	Saccharides and Alcohols	7512-17-6	B	1130400	1242100	1361400	1402400	1317700	1359500	1234800	1331700	1155800	1490000	1302000	1205400	1193600	C00140	ko00520,ko01100,ko02010
192	pme2776	253.1	252.086	C10H12N4O4	[M+H]+	2'-Deoxyinosine	Nucleotides and derivatives	Nucleotides and derivatives	890-38-0	B	5970500	3755200	3922600	3681400	5836400	21573	24525	364370	125380	51908	2817100	2790500	2477700	C05512	ko00230,ko01100,ko02010
193	pme2801	167	166.049	C6H6N4O2	[M+H]+	7-Methylxanthine	Nucleotides and derivatives	Nucleotides and derivatives	552-62-5	B	4939.8	3808.5	4507	2557.7	9418	5322.3	3014.1	6437.4	1694.5	3888.4	6635.5	4320.8	4047.7	C16353	ko00232,ko01100,ko01110
194	pme2890	269	268.055	C8H16N2O4S2	[M+H]+	L-Homocystine	Amino acids and derivatives	Amino acids and derivatives	626-72-2	B	1637300	1404700	1544000	1119400	2071400	26767	35340	162550	72729	58211	709600	680980	753920	C01817	ko00270
195	pme2960	273.07	272.069	C15H12O5	[M+H]+	Naringenin chalcone	Flavonoids	Chalcones	73692-50-9	A	10278000	24344000	28475000	10754000	13370000	17494000	23308000	24111000	13450000	11889000	16641000	16257000	16072000	C06561	ko00941,ko01100,ko01110
196	pme2993	193.1	192.042	C10H8O4	[M+H]+	Scopoletin(7-Hydroxy-5-methoxycoumarin)	Lignans and Coumarins	Coumarins	92-61-5	B	487210	203110	188420	595800	616720	102730	218270	128830	99878	428520	234770	258630	317940	C01752	ko00940,ko01110
197	pme3009	175	174.016	C6H6O6	[M+H]+	Trans-Citridic acid	Organic acids	Organic acids	4023-65-8	B	121540	159060	133660	167920	162810	7544.8	6312.3	8572	8518.7	7717.7	30057	31278	21884	--	--
198	pme3011	104.06	103.063	C4H9NO2	[M+H]+	γ-Aminobutyric acid	Organic acids	Organic acids	56-12-2	B	3551400	3787100	2161100	3018700	3461300	480480	659920	676250	431280	953850	1685900	1439900	1541100	C00334	ko00250,ko00330,ko00410,ko00650,ko00760,ko01100
199	pme3017	104	103.063	C4H9NO2	[M+H]+	2-Aminoisobutyric acid	Amino acids and derivatives	Amino acids and derivatives	62-57-7	B	712480	676380	665910	587680	619760	309160	453490	504550	420050	569680	502200	463580	502160	C03665	--
200	pme3033	104	103.063	C4H9NO2	[M+H]+	N,N-Dimethylglycine	Amino acids and derivatives	Amino acids and derivatives	1118-68-9	B	1439800	1447900	955610	1157200	1387300	290860	505250	593070	346400	525580	781430	704720	702650	C01026	ko00260,ko01100
201	pme3174	324	323.052	C9H14N3O8P	[M+H]+	Cytidine 5'-monophosphate(Cytidylic acid)	Nucleotides and derivatives	Nucleotides and derivatives	63-37-6	B	250200	113260	132900	165790	175010	18715	17696	32858	20590	9	70365	76310	72659	C00055	ko00240,ko01100
202	pme3184	332	331.068	C10H14N5O6P	[M+H]+	2'-Deoxyadenosine-5'-monophosphate	Nucleotides and derivatives	Nucleotides and derivatives	653-63-4	B	285600	253590	184360	266080	262010	413930	239010	325660	408310	206190	297460	327330	341940	C00360	ko00230,ko01100
203	pme3227	579	578.164	C27H30O14	[M+H]+	Vitexin 2''-O-β-L-rhamnoside	Flavonoids	Flavonoid carbonoside	64820-99-1	B	446080	577980	1474800	576880	499960	2616100	1837400	2045400	1367800	521630	1156000	1108900	1091000	C12628	ko00944
204	pme3337	384	383.108	C14H17N5O8	[M+H]+	N6-Succinyl Adenosine	Nucleotides and derivatives	Nucleotides and derivatives	4542-23-8	A	1042600	1391900	300010	985840	1089700	793990	879290	740310	1059400	1041500	788230	866180	856930	--	--
205	pme3384	162	161.069	C6H11NO4	[M+H]+	N-Acetylthreonine	Amino acids and derivatives	Amino acids and derivatives	17093-74-2	B	28883	21409	22962	26578	20279	16000	9631.6	5417.9	7504.3	12803	13168	11553	7311.2	--	--
206	pme3388	189	188.127	C7H16N4O2	[M+H]+	H-HomoArg-OH	Amino acids and derivatives	Amino acids and derivatives	156-86-5	B	69060	72286	74755	74840	49222	54717	57345	70721	29091	50890	61513	46509	70077	C01924	--
207	pme3459	317.2	316.204	C20H28O3	[M+H]+	Caffeyl alcohol	Phenolic acids	Phenolic acids	469-83-0	B	30354	24653	36791	27769	25044	23058	24113	18375	21106	32152	31595	36073	29137	C09066	--
208	pme3732	244.09	243.086	C9H13N3O5	[M+H]+	Cytidine	Nucleotides and derivatives	Nucleotides and derivatives	65-46-3	A	19913000	21480000	17957000	12984000	23216000	189240	161990	797640	302520	211470	6530500	6370200	6381400	C00475	ko00240,ko01100,ko02010
209	pme3961	252	251.102	C10H13N5O3	[M+H]+	Deoxyadenosine	Nucleotides and derivatives	Nucleotides and derivatives	958-09-8	A	67833000	50890000	50897000	50664000	68149000	389790	429260	5594300	1922300	916770	38967000	36789000	33757000	C00559	ko00230,ko01100,ko02010
210	pme3967	312	311.123	C12H17N5O5	[M+H]+	2-(Dimethylamino)guanosine	Nucleotides and derivatives	Nucleotides and derivatives	2140-67-2	B	2025000	1416400	1537000	1358000	2134000	135520	44815	91920	52276	144120	929120	1027500	1022100	--	--
211	pme3968	166	165.065	C6H7N5O	[M+H]+	7-Methylguanine	Nucleotides and derivatives	Nucleotides and derivatives	578-76-7	B	7573.5	4846	4696.4	7912.9	5082.6	12474	21379	17179	19807	21727	9982.6	9357.7	8774.5	C02242	--
212	pmf0018	102.05	101.048	C4H7NO2	[M+H]+	1-Aminocyclopropanecarboxylic acid	Amino acids and derivatives	Amino acids and derivatives	22059-21-8	B	4943100	2767200	4470100	5462400	4507000	7256400	5954600	5862700	4171300	6656700	6906600	5561300	5435300	--	--
213	pmf0289	336.16	335.159	C15H21N5O4	[M+H]+	Riboprine	Nucleotides and derivatives	Nucleotides and derivatives	7724-76-7	B	9317.6	13558	11215	4383.9	5490.9	5002.6	4162.5	12667	3379.6	5934.9	8033.2	7510	9023.5	C16427	ko00908,ko01110
214	pmf0440	163.1	162.068	C10H10O2	[M+H]+	4-MethoxycinnaMaldehyde	Phenolic acids	Phenolic acids	1963-36-6	B	7144.4	7634	5118.7	7109	6156.1	7711.5	7360.9	10450	8476.1	9396.2	5987.4	8355.8	9490.8	--	--
215	pmp000004	331.08	330.074	C17H14O7	[M+H]+	Jaceosidin	Flavonoids	Flavonoid	18085-97-7	B	52316	9	45570	55280	67300	35775	39624	37240	26344	39236	40757	38699	34861	--	--
216	pmp000116	433.1	432.106	C21H20O10	[M+H]+	Apigenin-8-C-glucoside	Flavonoids	Flavonoid carbonoside	3681-93-4	A	443720	6089200	645130	491730	427910	931350	482800	677350	633960	2279000	1259400	1229900	1154400	C01460	ko00941,ko00944
217	pmp000117	433.2	432.142	C22H24O9	[M+H]+	3,5,6,7,8,3′,4′-Heptamethoxyflavone	Flavonoids	Flavonols	1178-24-1	A	106980	79019	63971	119280	83704	32377	33077	31669	39857	35670	63071	60208	59142	--	--
218	pmp000120	463.1	462.116	C22H22O11	[M+H]+	Diosmetin-6-C-glucoside	Flavonoids	Flavonoid	-	B	34236	315310	59635	30120	40721	72061	43206	61561	70931	153240	76218	75412	86093	--	--
219	pmp000127	625.2	624.169	C28H32O16	[M+H]+	Chysoeriol-6,8-di-C-glucoside	Flavonoids	Flavonoid carbonoside	-	B	426910	3126300	1167700	394410	451640	1550600	1388500	1210600	1163300	984330	1184500	1148600	1158600	--	--
220	pmp000236	565.1	564.148	C26H28O14	[M+H]+	Apigenin-6-C-glucose-8-xylcose	Flavonoids	Flavonoid carbonoside	-	B	9417400	9	7948800	10061000	9522000	964710	8817100	4754400	2151400	17193000	6231000	6120700	6164500	--	--
221	pmp000411	565.15	564.148	C26H28O14	[M+H]+	Genistein 8-C-apiosyl(1→6)glucoside	Flavonoids	Flavonoid carbonoside	-	B	765860	9	2489800	902480	815360	5667700	3701500	4773600	2694400	942750	1888400	1865000	1917400	--	--
222	pmp000413	433.11	432.106	C21H20O10	[M+H]+	Genistein 8-C-glucoside	Flavonoids	Flavonoid carbonoside	66026-80-0	A	456530	10111000	913810	464830	477540	1645100	754220	962080	870560	3771500	2143000	2026800	2068000	C10420	--
223	pmp000460	284.1	283.121	C17H17NO3	[M+H]+	N-cis-Paprazine	Alkaloids	Phenolamine	-	A	312130	1224600	6727400	888260	568560	1428800	1010100	2197900	1911400	4392200	1851400	1987600	1932400	--	--
224	pmp000531	519.18	518.179	C26H30O11	[M+H]+	Phellamurin	Flavonoids	Dihydroflavonol	52589-11-4	B	76586	231660	586430	71505	107090	97194	102860	121640	78811	74927	145450	125590	137450	C09808	--
225	pmp000545	355.1	354.095	C16H18O9	[M+H]+	4-Caffeoylquinic acid	Phenolic acids	Phenolic acids	905-99-7	B	89196	124800	127330	116090	110230	431740	501320	407580	294150	318690	268500	325200	254730	--	--
226	pmp000562	257.1	256.074	C15H12O4	[M+H]+	Pinocembrin	Flavonoids	Dihydroflavone	480-39-7	B	10317	12551	26747	9314.4	7068.7	106540	86822	54171	47509	40682	35799	36933	37971	C09827	ko00941
227	pmp000579	463.12	462.116	C22H22O11	[M+H]+	Diosmetin-7-O-galactoside	Flavonoids	Flavonoid	-	A	1577200	3400900	1112000	1492300	1466700	6731300	12146000	7721000	4945300	8601300	4454700	4260700	4091700	--	--
228	pmp000580	465.1	464.096	C21H20O12	[M+H]+	Isoquercitrin(Quercetin 3-O-β-D-glucoside)	Flavonoids	Flavonols	482-35-9	A	9255400	2915900	4988600	7914000	10767000	46190	9	9	9	9	4289100	3439500	3004600	--	--
229	pmp000595	611.16	610.153	C27H30O16	[M+H]+	Luteolin-7,3'-Di-O-β-D-Glucoside	Flavonoids	Flavonoid	257-724-7	B	1262100	9	3445600	1665400	1605400	1838600	1187500	1296700	1149700	402970	1361900	1486100	1495100	--	--
230	pmp000596	627.15	626.148	C27H30O17	[M+H]+	Quercetin 3,7-bis-O-β-D-glucoside	Flavonoids	Flavonols	-	A	508990	238890	227230	454370	670320	12508	42473	23481	151460	33282	275670	251300	255980	--	--
231	pmp001105	757.22	756.211	C33H40O20	[M+H]+	Kaempferol-3-neohesperidoside-7-glucoside	Flavonoids	Flavonols	-	A	10140	179750	50801	23436	17439	286360	194420	219950	122860	73535	110930	106780	117290	--	--
232	pmp001106	595.17	594.159	C27H30O15	[M+H]+	Vitexin-2-O-D-glucopyranoside	Flavonoids	Flavonoid carbonoside	-	B	392130	6962300	1760600	438820	398800	4713900	3293300	3441200	2598600	1752900	2898200	2782500	2591500	--	--
233	pmp001107	757.22	756.211	C33H40O20	[M+H]+	Kaempferol-3-rutinoside-7-glucoside	Flavonoids	Flavonols	-	A	14021	179200	57117	21240	17565	254840	202800	200210	119010	68868	112020	106230	105390	--	--
234	pmp001110	535.14	534.137	C25H26O13	[M+H]+	Apigenin-6-C-β-D-xyloside-8-C-β-Darabinoside	Flavonoids	Flavonoid carbonoside	-	A	356950	525120	564480	474010	380450	16242	2516800	1146600	1662300	6113100	1414200	1194600	1367600	--	--
235	pmp001111	579.17	578.164	C27H30O14	[M+H]+	Violanthin	Flavonoids	Flavonoid carbonoside	40581-17-7	A	9	9848500	9	9	9	280910	113230	174210	114720	9	1676100	1615200	1654100	C10196	--
236	pmp001113	153.05	152.047	C8H8O3	[M+H]+	Dihydro-p-coumarat	Phenolic acids	Phenolic acids	-	A	4190.7	8508.9	8229.7	5672.5	4373.8	12169	13104	18243	11023	9856.4	7524.9	9168.5	7346.4	--	--
237	pmp001114	549.16	548.153	C26H28O13	[M+H]+	Hesperetin C-malonylhexoside	Flavonoids	Flavonoid carbonoside	-	A	9	4467600	9	9	9	9	9	9	9	9	687170	607280	657720	--	--
238	pmp001116	261.11	260.105	C15H16O4	[M+H]+	Nobilin E	Others	Others	-	B	1228	21272	2585.4	9	9	10338	78132	10440	24874	9620.9	16111	13775	14498	--	--
239	pmp001125	275.13	274.121	C16H18O4	[M+H]+	Dendrobin A	Others	Others	-	B	74561	23593	92936	76717	10125	148860	394610	152840	109090	24294	106990	102070	107730	--	--
240	pmp001133	279.23	278.212	C17H28NO2+	[M+H]+	N-methyldendrobine	Alkaloids	Sesquiterpene alkaloids	-	A	4024300	2226900	4252700	4096900	4815600	362850	591970	739440	314940	635660	2511500	2675500	2753000	--	--
241	pmp001134	294.16	293.199	C17H27NO3	[M+H]+	Nobiline	Alkaloids	Alkaloids	-	A	248340	363410	679370	345270	252920	137900	223360	419560	113790	149980	300440	304300	297120	--	--
242	pmp001163	463.1	462.116	C22H22O11	[M+H]+	Tectoridin	Flavonoids	Isoflavones	611-40-5	B	88494	133710	53152	72045	83728	380000	625280	416490	246720	493430	261500	195420	219990	C10533	--
243	pmp001164	493.1	492.127	C23H24O12	[M+H]+	Iristectorin B	Flavonoids	Isoflavones	94396-09-5	B	2088.2	409.24	8594	1750.8	5902.9	2466.9	5489.6	3179.9	2613	5051.2	5807.2	3794.1	3455.1	--	--
244	pmp001178	284.1	283.121	C17H17NO3	[M+H]+	N-cis-sinapoyltyramine	Alkaloids	Phenolamine	-	A	319830	1231000	6803000	875400	588080	1450000	1023300	2258900	1877600	4506200	2003700	1933900	2001700	--	--
245	pmp001193	126	125.015	C2H7NO3S	[M+H]+	Taurine	Alkaloids	Alkaloids	107-35-7	A	687870	721080	752820	771360	750850	704360	660280	710730	621250	645950	731440	731970	609340	C00245	ko00430,ko00920,ko01100,ko02010
246	pmp001198	132.1	131.095	C6H13NO2	[M+H]+	6-Deoxyfagomine	Alkaloids	Alkaloids	197449-09-5	A	301370	464000	596330	283800	321600	412180	574350	542700	241020	452270	405680	411490	434840	--	--
247	pmp001200	314.1	313.131	C18H19NO4	[M+H]+	Methoxy-N-Caffeoyltyramine	Alkaloids	Phenolamine	-	A	2503700	7330600	16956000	5437400	2708800	11798000	6593800	5828900	3984300	13938000	7780500	7975300	7812500	--	--
248	pmp001214	310.16	310.166	C16H24NO5+	[M]+	Sinapine	Alkaloids	Alkaloids	18696-26-9	B	2611400	3497000	438580	5046200	3469400	8068600	21141000	13532000	6663000	15282000	9058800	8423400	9205000	C00933	ko00940
249	pmp001246	472.21	472.218	C22H34NO10+	[M]+	Sinapine glucoside	Alkaloids	Alkaloids	-	A	285240	126860	62150	367400	285490	506250	3167200	1780200	1525800	2058400	952630	944530	947540	--	--
250	pmp001250	520.34	520.341	C26H51NO7P+	[M]+	LysoPC 18:2 (2n isomer)	Lipids	LPC	-	A	17561000	24276000	39989000	45439000	28328000	29113000	29527000	40234000	25317000	21149000	30372000	29703000	29523000	--	--
251	pmp001251	520.34	520.341	C26H51NO7P+	[M]+	LysoPC 18:2	Lipids	LPC	-	A	16625000	23913000	42684000	42988000	27496000	31472000	27665000	40964000	25396000	20882000	29704000	30530000	29939000	--	--
252	pmp001252	284.13	283.121	C17H17NO3	[M+H]+	N-p-Coumaroyltyramine	Alkaloids	Phenolamine	36417-86-4	A	9497.1	35612	181120	28691	18144	41989	29570	62661	53215	125780	52193	57825	54263	--	--
253	pmp001255	314.14	313.131	C18H19NO4	[M+H]+	N-Trans-feruloyltyramine	Alkaloids	Phenolamine	66648-43-9	A	5680100	16453000	36847000	11895000	6117300	24110000	14382000	12823000	8491800	28870000	16311000	16775000	17377000	C02717	--
254	pmp001256	314.14	313.131	C18H19NO4	[M+H]+	N-Cis-feruloyltyramine	Alkaloids	Phenolamine	80510-09-4	A	5909000	17183000	37086000	11673000	6088700	23702000	15069000	13304000	8733100	31667000	17934000	17881000	17162000	--	--
255	pmp001260	364.29	363.278	C22H37NO3	[M+H]+	N-(2-Hydroxyethyl)eicosapentaenoic acid	Lipids	Free fatty acids	-	B	68509	52827	63621	25774	54926	9	9	9	9	9	22249	19007	19340	--	--
256	pmp001264	274.28	273.267	C16H35NO2	[M+H]+	Hexadecylsphingosine	Lipids	Sphingolipids	-	A	5680900	7587500	4903700	5449000	4828200	7835600	6557200	5758400	6861000	7039700	6586700	6776800	6735600	--	--
257	pmp001269	286.31	285.303	C18H39NO	[M+H]+	Hexadecyl ethanolamine	Others	Others	-	A	338730	442890	429920	321180	370320	478160	229860	256140	207500	224170	360830	347650	384850	--	--
258	pmp001270	494.33	493.317	C24H48NO7P	[M+H]+	LysoPC(16:1)	Lipids	LPC	-	A	121590	113130	325280	344940	171750	138150	111830	195230	113890	85722	158780	162690	154190	--	--
259	pmp001271	679.39	678.383	C33H58O14	[M+H]+	2,3-Dihydroxypropyl-9,12-octadecadienoate-hexose-hexose	Lipids	Free fatty acids	-	A	48745	35145	176330	87854	95893	18618	90839	144940	112940	39997	91461	92056	101570	--	--
260	pmp001272	478.29	477.286	C23H44NO7P	[M+H]+	3-{(2-Aminoethoxy)(hydroxy)phosphoryl]oxy}-2-12-octadecadienoate	Alkaloids	Alkaloids	-	B	12520000	14117000	29149000	23782000	17186000	20391000	14484000	21366000	15803000	11954000	17727000	17925000	17982000	--	--
261	pmp001275	672.42	671.409	C31H61O14N	[M+H]+	3-Hydroxypropyl palmitate glc-glucosamine	Alkaloids	Alkaloids	-	A	1118200	920660	1033000	829940	1171900	212050	194300	393180	233960	270310	659060	686080	706300	--	--
262	pmp001276	677.37	676.367	C33H56O14	[M+H]+	2,3-Dihydroxypropyl-9,12,15-octadecatrienoate-hexose-hexose	Lipids	Free fatty acids	-	A	655920	696490	508710	501810	840090	277350	212550	410660	219280	288140	458390	473500	529550	--	--
263	pmp001277	454.3	453.286	C21H44NO7P	[M+H]+	3-{(2-Aminoethoxy)(hydroxy)phosphoryl]oxy}-2-hydroxypropyl palmitate	Alkaloids	Alkaloids	-	A	1728100	3354500	2967600	2915100	1854800	3177300	1992400	2062400	1671400	1905400	2374300	2397000	2392600	--	--
264	pmp001280	480.31	479.301	C23H46NO7P	[M+H]+	3-{[(2-Aminoethoxy)(hydroxy)phosphoryl]oxy}-2-hydroxypropyl-9,12-octadecenoate	Alkaloids	Alkaloids	-	A	912390	677720	1383400	1733100	1201700	1762500	1177300	1706100	1220600	756620	1234400	1270600	1261100	--	--
265	pmp001281	522.36	521.348	C26H52NO7P	[M+H]+	LysoPC(18:1)	Lipids	LPC	-	A	3846000	4440800	5159500	11190000	6485300	8344900	7874700	10585000	7077600	4085600	6715000	6896100	6872400	--	--
266	pmp001283	355.29	354.277	C21H38O4	[M+H]+	Glyceryl linoleate	Lipids	Glycerol ester	26545-74-4	A	841400	1071900	905320	981770	1017400	37615	44878	312250	101430	158030	642670	665840	620100	--	--
267	pmp001284	331.28	330.277	C19H38O4	[M+H]+	Glycerin Monopalmitate	Lipids	Glycerol ester	542-44-9	A	503650	658590	379130	445810	531470	13962	6678.6	73362	12641	17044	276560	278470	278400	--	--
268	pmp001287	120.08	119.074	C8H9N	[M+H]+	N-Benzylmethylene isomethylamine	Alkaloids	Alkaloids	-	A	3893100	4030300	5269600	3230500	4106400	6761100	3767700	5213500	2126700	3766800	4244900	4139600	4010800	--	--
269	pmp001309	465.1	464.096	C21H20O12	[M+H]+	6-Hydroxykaempferol-7-O-glucoside	Flavonoids	Flavonols	-	A	9524000	3994600	5054500	11648000	13753000	88076	61442	63632	69990	28289	3854300	3040000	5646100	--	--
270	pmp001310	627.2	626.148	C27H30O17	[M+H]+	6-Hydroxykaempferol-3,6-O-Diglucoside	Flavonoids	Flavonols	-	B	91565	36627	86305	94280	161000	11300	22525	11913	482900	15242	94499	92055	99245	--	--
271	pmp001311	627.2	626.148	C27H30O17	[M+H]+	6-Hydroxykaempferol-7,6-O-Diglucoside	Flavonoids	Flavonols	-	A	477750	345160	256120	374790	984320	20642	57397	31449	155380	48376	329590	257450	274770	--	--
272	pmp001312	789.2	788.201	C33H40O22	[M+H]+	6-Hydroxykaempferol-3,7,6-O-triglycoside	Flavonoids	Flavonols	-	A	248670	278630	575670	258720	310200	65726	88670	43307	256890	56978	227570	213540	221210	--	--
